# Socially-Assigned Race, Healthcare Discrimination and Preventive Healthcare Services

Tracy MacIntosh<sup>1</sup>, Mayur M. Desai<sup>2,3</sup>, Tene T. Lewis<sup>4</sup>, Beth A. Jones<sup>2</sup>, Marcella Nunez-Smith<sup>2,3,5,6\*</sup>

**1** Department of Emergency Medicine, School of Medicine, Yale University, New Haven, Connecticut, United States of America, **2** Department of Chronic Disease Epidemiology, School of Public Health, Yale University, New Haven, Connecticut, United States of America, **3** Robert Wood Johnson Foundation Clinical Scholars Program, School of Medicine, Yale University, New Haven, Connecticut, United States of America, **4** Department of Epidemiology, School of Public Health, Emory University, Atlanta, Georgia, United States of America, **5** Section of General Internal Medicine, Department of Internal Medicine, School of Medicine, Yale University, New Haven, Connecticut, United States of America, **6** Global Health Leadership Institute, Yale University, New Haven, Connecticut, United States of America

## Abstract

**Background:** Race and ethnicity, typically defined as how individuals self-identify, are complex social constructs. Self-identified racial/ethnic minorities are less likely to receive preventive care and more likely to report healthcare discrimination than self-identified non-Hispanic whites. However, beyond self-identification, these outcomes may vary depending on whether racial/ethnic minorities are perceived by others as being minority or white; this perception is referred to as socially-assigned race.

**Purpose:** To examine the associations between socially-assigned race and healthcare discrimination and receipt of selected preventive services.

**Methods:** Cross-sectional analysis of the 2004 Behavioral Risk Factor Surveillance System "Reactions to Race" module. Respondents from seven states and the District of Columbia were categorized into 3 groups, defined by a composite of self-identified race/socially-assigned race: Minority/Minority (M/M, n=6,837), Minority/White (M/W, n=929), and White/White (W/W, n=25,913). Respondents were 18 years or older, with 61.7% under age 60; 51.8% of respondents were female. Measures included reported healthcare discrimination and receipt of vaccinations and cancer screenings.

**Results:** Racial/ethnic minorities who reported being socially-assigned as minority (M/M) were more likely to report healthcare discrimination compared with those who reported being socially-assigned as white (M/W) (8.9% vs. 5.0%, p=0.002). Those reporting being socially-assigned as white (M/W and W/W) had similar rates for past-year influenza (73.1% vs. 74.3%) and pneumococcal (69.3% vs. 58.6%) vaccinations; however, rates were significantly lower among M/M respondents (56.2% and 47.6%, respectively, p-values<0.05). There were no significant differences between the M/M and M/W groups in the receipt of cancer screenings.

**Conclusions:** Racial/ethnic minorities who reported being socially-assigned as white are more likely to receive preventive vaccinations and less likely to report healthcare discrimination compared with those who are socially-assigned as minority. Socially-assigned race/ethnicity is emerging as an important area for further research in understanding how race/ethnicity influences health outcomes.

**Citation:** MacIntosh T, Desai MM, Lewis TT, Jones BA, Nunez-Smith M (2013) Socially-Assigned Race, Healthcare Discrimination and Preventive Healthcare Services. PLoS ONE 8(5): e64522. doi:10.1371/journal.pone.0064522

**Editor:** Kathleen A. O'Connor, University of Washington, United States of America

**Received:** August 1, 2012; **Accepted:** April 16, 2013; **Published:** May 21, 2013

**Copyright:** © 2013 MacIntosh et al. This is an open-access article distributed under the terms of the Creative Commons Attribution License, which permits unrestricted use, distribution, and reproduction in any medium, provided the original author and source are credited.

**Funding:** TM was supported by a grant from the Yale School of Medicine Office of Student Research. MNS was supported, in part, by 1) the Yale Center for Clinical Investigation via Clinical and Translational Science Award (CTSA) Grant Number UL1 RR024139 from the National Center for Advancing Translational Sciences (NCATS), a component of the National Institutes of Health (NIH), and NIH Roadmap for Medical Research, 2) the Association of American Medical Colleges (AAMC) Nickens Faculty Fellowship, and 3) the National Institutes of Health/National Cancer Institute: R21 CA134980-01 (PI: Nunez-Smith, M) at the time of this research. The manuscript contents are solely the responsibility of the authors and do not necessarily represent the official view of Yale University, NCRR, NIH, or the AAMC. None of the funders played any role in the design and conduct of the study, data collection, management, analysis, interpretation of the data, or the preparation, review, or approval of the manuscript. MNS had full access to all of the data in the study and takes responsibility for the integrity of the data and the accuracy of the data analysis.

**Competing Interests:** The authors have declared that no competing interests exist.

\* E-mail: marcella.nunez-smith@yale.edu

## Introduction

Race is widely-recognized as a primarily social, not biological, construct. Generally in health services and outcomes research, race/ethnicity is measured as respondent self-identification. However, race/ethnicity is also ascribed to individuals by others in social interactions, referred to as socially-assigned race. One's

self-identification may or may not be the same as his/her socially-assigned race. Social assignment may be a largely unrecognized determinant of observed racial/ethnic differences in healthcare outcomes.

Differences in healthcare outcomes between patients who self-identify as racial/ethnic minority and those who self-identify as white are widely-recognized [1,2]. However, the broad demo-

graphic classifications currently used (i.e. White, Black/African American, Asian, American Indian/Alaska Native and Native Hawaiian/Pacific Islander and Hispanic), may obscure differences within racial/ethnic groups where there is often variability in phenotypic characteristics. Thus, re-examining and expanding the definitions of racial/ethnic categories is one recommended way to enhance the quality of health services research and delivery [3], and isolate factors associated with racial/ethnic healthcare disparities that may be obscured by the current categorization strategy [1,3]. A novel study recently found self-identified racial/ethnic minority individuals who reported being perceived in societal interactions as white had higher levels of self-reported health compared with racial/ethnic minority individuals who reported being perceived by society as minority [4]. This intriguing new area of research suggests that race as it is perceived by others or socially-assigned race, in addition to self-identified race/ethnicity, may be associated with key health and healthcare outcomes. Notably, this prior work concluded being socially-assigned as non-Hispanic white conveyed an advantage in health outcomes regardless of individual self-identification. It is unknown whether this previously observed advantage of being socially-assigned as non-Hispanic white extends beyond health status to areas of persistent healthcare inequity such as receipt of preventive health services.

Patients who self-identify as racial/ethnic minorities underutilize recommended preventive health services such as age-appropriate vaccinations [5–10] and disease screening [11–17]. These racial/ethnic inequities remain despite adjusting for insurance coverage [16], socioeconomic status [11,12,15,16], often raising the question of whether the experience of healthcare discrimination may be an important contributor. Patient-reported healthcare discrimination has already been shown as independently associated with limited healthcare utilization, self-reported quality of care, low adherence to care plans and poor health outcomes [18–23].

The Institute of Medicine identified closing the healthcare utilization gap and eliminating any contribution of healthcare provider bias to observed racial/ethnic healthcare inequities as two priorities for reducing racial/ethnic disparities in healthcare [1]. Recognizing race/ethnicity as a complex phenomenon that takes into account both self-identification and social interactions with individuals and institutions [24], we sought to first examine the agreement between self-reported race and self-report of socially-assigned race, and then characterize its association with both reported healthcare discrimination and self-reported receipt of preventive healthcare services. We hypothesized that self-identified racial/ethnic minority respondents who report being socially-assigned as minorities would report higher rates of healthcare discrimination when compared with: 1) racial/ethnic minority respondents who report being socially-assigned as non-Hispanic white and 2) self-identified non-Hispanic white respondents. We further hypothesized that self-identified racial/ethnic minority respondents who report being socially-assigned as non-Hispanic white would have higher rates of self-reported recommended preventive health service utilization compared with self-identified racial/ethnic minority respondents who report being socially-assigned as minorities. In addition, we expected that rates of utilization would be similar between self-identified minorities socially-assigned as non-Hispanic white and self-identified non-Hispanic whites.

## Methods

### Sample and Data Collection

We used data from the optional “Reactions to Race” module and the standard core sections on demographics, immunizations

and preventive healthcare screening from the 2004 Behavioral Risk Factor Surveillance System (BRFSS), an annual, national, cross-sectional, random-digit dialing telephone survey coordinated by the United States’ Centers for Disease Control and Prevention (CDC) [25]. The Reactions to Race module has been described elsewhere [4], and underwent iterative cognitive testing, field and pilot testing prior to use. The 2004 database was selected because it was the year with the greatest number of states fielding this optional module. The participating states included Arkansas, Colorado, Delaware, Mississippi, Rhode Island, South Carolina, and Wisconsin, as well as the District of Columbia. Almost all participants (99.8%) from states using the “Reactions to Race” module reported both self-identified race and socially-assigned race, and the final analysis excluded only 59 individuals who were missing data for either of these variables. The response rates for the participating states varied between 38.6% for Rhode Island to 62.7% for Colorado, with an overall response rate of 49.8%, consistent with typical BRFSS response rates [26]. The BRFSS data are publicly available data collected by the CDC, accessible at <http://www.cdc.gov/brfss/>, and ethical approval by individual institutions is not required.

### Independent Variables

The primary independent variable of interest was composite race, comprised of respondent self-identified race/ethnicity and self-reported socially-assigned race/ethnicity. Respondent self-identified race was dichotomized as either non-Hispanic white or racial/ethnic minority; the latter included black/African American, Asian, Native Hawaiian/Pacific Islander, and American Indian/Alaska Native, multiracial and “other.” All respondents who identified their ethnicity as Hispanic or Latino were included in the self-identified racial/ethnic minority category. To assess socially-assigned race/ethnicity, respondents were asked, “How do other people classify you in this country?” and all responses other than non-Hispanic white were re-categorized as being socially-assigned as minority. Racial/ethnic groups were dichotomized into non-Hispanic white and minority in order to ensure adequate category sizes for comparison. Our final analysis categorized eligible respondents into three groups, indicating how they self-identified/socially-assigned: Minority/Minority (M/M), Minority/White (M/W) and White/White (W/W). A small percentage of respondents self-identified as non-Hispanic white but reported being socially-assigned as minority (White/Minority (W/M),  $n = 248$ , 0.73%). Our primary hypotheses involved comparing healthcare outcomes between the M/M, M/W and W/W groups. Because the W/M group comprised less than 1% of the sample, this group was excluded from the present analysis.

The covariates in our analysis were age, sex, marital status, employment status, high school completion, annual household income, and health insurance status.

### Dependent Variables

**Healthcare Discrimination.** To assess racial/ethnic healthcare discrimination, respondents were asked, “Within the past 12 months when seeking health care, do you feel your experiences were worse than, the same as, or better than people of other races?” Response options were, “worse than other races,” “the same as other races,” “better than other races,” “worse than some races, better than other races,” and “only encountered people of the same race.” We collapsed responses into a three-level variable. “Worse than other races” or “worse than some, better than others” responses were classified as “yes” to healthcare discrimination. Those who reported their treatment as the same or better than other races were classified as “no” to healthcare discrimina-

tion. Respondents who did not know, or were unsure, were classified as “uncertain.” A small percentage (0.27%) of participants responded that they “only encountered people of the same race” when seeking healthcare, and were excluded from analysis.

**Healthcare outcomes: Having a personal physician and receipt of preventive healthcare services.** We also evaluated seven self-reported healthcare outcomes of interest, all categorized as “yes” or “no” binary variables for eligible respondents: (1) having a personal physician, (2) receipt of influenza vaccination within the last year if  $\geq 65$  years of age [27], (3) receipt of pneumococcal vaccination if  $\geq 65$  years of age [28], (4) breast cancer screening (received both mammogram and clinical breast exam) within the last year for women  $\geq 40$  years of age [29], (5) cervical cancer screening (Pap smear) within the last 3 years for women  $\geq 21$  years of age [29], (6) prostate cancer screening (received both prostate-specific antigen (PSA) test and digital rectal exam (DRE)) within the last year for men  $\geq 50$  years of age [29], and (7) colorectal cancer screening (fecal occult blood test (FOBT) within the last year or colonoscopy within the last 10 years) for individuals  $\geq 50$  years of age [29]. Age-appropriate early cancer detection indicators were selected based on the 2004 American Cancer Society guidelines [29].

## Data Analysis

First, we performed standard frequency analyses to describe the sample. Second, we performed bivariate analyses using the chi-square test to examine the unadjusted associations between racial/ethnic assignment groups (M/M, M/W or W/W) and sociodemographic variables, having a personal physician, perceived healthcare discrimination, and receipt of preventive healthcare services. We examined both overall associations and pairwise associations among the M/M, M/W and W/W groups. Finally, we used multivariable logistic regression modelling to assess the association between socially-assigned race/ethnicity and each healthcare outcome, adjusting for age, health insurance, marital status, education, employment, income and sex, where appropriate, to calculate odds ratios and confidence intervals for healthcare outcomes significant at the 0.05 level. Analyses were conducted with SAS software Version 9.2 [30], and SUDAAN software Release 10.0 [31], and incorporated weighting to account for sampling design.

## Results

### Sample Characteristics

The overall sample included 33,679 respondents (Table 1). The majority (78.1%) of the sample self-identified as non-Hispanic white, 15.5% self-identified as black, 4.4% self-identified as Hispanic, and 1.2% self-identified as multiracial (not presented in Table 1). Other racial/ethnic groups comprised less than 1% of the sample. The majority was married (60.1%) and employed (63.5%). About one-half was female (51.8%) and had annual household incomes greater than \$35,000 (50.9%). The vast majority of respondents had completed at least high school (90.0%) and reported having health insurance (85.5%).

Respondents were categorized into 3 groups, defined by self-identified race/socially-assigned race (minority or non-Hispanic white): M/M ( $n = 6,837$ , 19.0%), M/W ( $n = 929$ , 3.4%), and W/W ( $n = 25,913$ , 77.6%). There was high agreement between self-identified and socially-assigned race for white (98.5%) and black (95.6%) respondents. However, 26% of Hispanic respondents reported being socially-assigned as white, 4.7% as black and 7.4% as other. The M/W group was comprised almost exclusively of participants who self-identified as Hispanic (98.5%). The M/M

group differed significantly from the M/W group on a number of sociodemographic variables (Table 1). Compared with the M/M group, the M/W group was more likely to be married (55.6% vs. 41.5%,  $p < 0.001$ ), more likely to have completed high school (85.0% vs. 79.4%,  $p = 0.004$ ), had higher annual household incomes ( $p < 0.001$ ) and was more likely to have health insurance (80.1% vs. 74.3%,  $p = 0.01$ ). Both groups were less likely to have health insurance compared with the W/W group (88.5% among W/W respondents,  $p$ -values  $< 0.001$ ). Compared with either self-identified minority group, the W/W group was significantly older ( $51.0 \pm 16.8$  years) and more likely to be married (64.8%), to have completed high school (92.8%) and to have a higher annual household income (Table 1) ( $p$ -values  $< 0.01$ ). The W/W group was more likely to be employed (64.1%,  $p = 0.005$ ) compared to the M/M group only, and there was no significant difference in employment rates between the M/W group and either comparison group.

### Adjusted analysis of association between socially-assigned race and healthcare outcomes

Although both W/W and M/W groups had higher odds of having a personal physician compared with the M/M group in initial analyses, this relationship was significant for only the W/W group (AOR = 1.15, 95% CI: 1.02, 1.29, Table 2). M/W respondents were more likely to receive both influenza (AOR = 1.83, 95% CI: 1.16, 2.87) and pneumococcal (AOR = 1.43, 95% CI: 0.93, 2.20) vaccinations than the M/M group, although the latter relationship was in part explained by sociodemographic variables (Table 2). Similarly, the W/W group was significantly more likely to receive either vaccination than the M/M group (influenza: AOR = 1.81, 95% CI: 1.48, 2.21; pneumococcal: AOR = 2.20, 95% CI: 1.78, 2.71). There were no statistically significant differences between the M/M and M/W groups for uptake of any of the appropriate cancer screening tests. In contrast, after adjustment, W/W women were less likely to have had appropriate breast cancer screening (AOR = 0.87, 95% CI: 0.77, 0.98) and cervical cancer screening (AOR = 0.67, 95% CI: 0.54, 0.84) compared with M/M women (Table 2). Unadjusted prostate and colorectal cancer screening odds ratios were higher for W/W respondents compared with M/M respondents; however, these relationships were attenuated in the adjusted analysis (Table 2). The M/W respondents had lower odds of healthcare discrimination compared with M/M respondents (AOR = 0.61, 95% CI: 0.39, 0.95, Table 2), after adjustment for potential confounders. W/W respondents also had lower odds of healthcare discrimination than M/M respondents (AOR = 0.27, 95% CI: 0.22, 0.33) and M/W respondents.

## Discussion

We found that U.S. adults in this study who self-identify as racial/ethnic minorities, but report being socially-assigned as non-Hispanic white, reported better healthcare outcomes compared with self-identified racial/ethnic minorities who are socially-assigned as racial/ethnic minorities. This minority/white (M/W) group was also significantly less likely to report healthcare discrimination compared with the minority/minority (M/M) group. However, the M/W group was significantly more likely to report healthcare discrimination than the white/white (W/W) group in our sample (results not shown). M/M respondents were less likely to have a personal physician or a medical home, and had lower rates of annual influenza and pneumococcal vaccinations compared with both the M/W and W/W groups. The M/W and W/W groups had similar rates of influenza immunization, and the

**Table 1.** Sample demographic characteristics of 2004 BRFSS Reactions to Race respondents.

| Category                            | Subcategory | Racial/ethnic assignment groups<br>(self-identified/socially-assigned) |                                                                 |                                                                    |                                                                        | P-values for Pairwise Comparisons |             |             |             |
|-------------------------------------|-------------|------------------------------------------------------------------------|-----------------------------------------------------------------|--------------------------------------------------------------------|------------------------------------------------------------------------|-----------------------------------|-------------|-------------|-------------|
|                                     |             | Total <sup>a</sup><br>(n = 33,679)<br>n (%)                            | White/ White <sup>b</sup> (W/W)<br>(n = 25,913, 76.9%)<br>n (%) | Minority/ White <sup>c</sup> (M/<br>W)<br>(n = 929, 2.8%)<br>n (%) | Minority/ Minority <sup>d</sup><br>(M/M)<br>(n = 6837, 20.3%)<br>n (%) | Overall P-<br>value               | W/W vs. M/W | W/W vs. M/M | M/W vs. M/M |
| <b>Age (years)</b>                  |             |                                                                        |                                                                 |                                                                    |                                                                        |                                   |             |             |             |
|                                     | <35         | 7305 (31.6)                                                            | 4957 (28.2)                                                     | 268 (44.0)                                                         | 2080 (43.2)                                                            | <0.001                            | <0.001      | <0.001      | NS          |
|                                     | 35–49       | 9838 (30.1)                                                            | 7420 (30.3)                                                     | 261 (26.8)                                                         | 2157 (29.8)                                                            |                                   |             |             |             |
|                                     | 50–64       | 9200 (22.1)                                                            | 7397 (23.5)                                                     | 216 (17.0)                                                         | 1587 (17.6)                                                            |                                   |             |             |             |
|                                     | 65+         | 7154 (16.2)                                                            | 6018 (18.0)                                                     | 179 (12.2)                                                         | 957 (9.4)                                                              |                                   |             |             |             |
| <b>Sex</b>                          |             |                                                                        |                                                                 |                                                                    |                                                                        | 0.002                             | <0.001      | NS          | <0.001      |
|                                     | Female      | 20877 (51.8)                                                           | 15760 (52.0)                                                    | 527 (43.1)                                                         | 4590 (52.6)                                                            |                                   |             |             |             |
|                                     | Male        | 12802 (48.2)                                                           | 10153 (48.0)                                                    | 402 (56.9)                                                         | 2247 (47.4)                                                            |                                   |             |             |             |
| <b>Married</b>                      |             | 17684 (60.1)                                                           | 14835 (64.8)                                                    | 487 (55.6)                                                         | 2362 (41.5)                                                            | <0.001                            | 0.001       | <0.001      | <0.001      |
| <b>Employed</b>                     |             | 20015 (63.5)                                                           | 15521 (64.1)                                                    | 500 (61.4)                                                         | 3994 (61.4)                                                            | 0.012                             | NS          | 0.005       | NS          |
| <b>Completed High School</b>        |             | 30216 (90.0)                                                           | 23928 (92.8)                                                    | 784 (85.0)                                                         | 5504 (79.4)                                                            | <0.001                            | <0.001      | <0.001      | 0.004       |
| <b>Annual Household Income (\$)</b> |             |                                                                        |                                                                 |                                                                    |                                                                        | <0.001                            | <0.001      | <0.001      | <0.001      |
|                                     | <15000      | 3667 (8.8)                                                             | 2191 (6.6)                                                      | 144 (13.0)                                                         | 1332 (16.8)                                                            |                                   |             |             |             |
|                                     | 15000–35000 | 9099 (28.5)                                                            | 6272 (25.6)                                                     | 281 (31.8)                                                         | 2546 (39.6)                                                            |                                   |             |             |             |
|                                     | >35000      | 16647 (50.9)                                                           | 14122 (56.0)                                                    | 385 (43.0)                                                         | 2140 (31.4)                                                            |                                   |             |             |             |
|                                     | Missing     | 4266 (12.0)                                                            | 3328 (11.8)                                                     | 119 (12.1)                                                         | 819 (12.7)                                                             |                                   |             |             |             |
| <b>Health Insurance</b>             |             | 29526 (85.5)                                                           | 23318 (88.5)                                                    | 763 (80.1)                                                         | 5445 (74.3)                                                            | <0.001                            | <0.001      | <0.001      | 0.01        |

a Numbers may not sum to total n due to missing data.  
 b White/White is defined as self-identified White/socially-assigned as White.  
 c Minority/White is defined as self-identified Minority/socially-assigned as White.  
 d Minority/Minority is defined as self-identified Minority/socially-assigned as Minority.  
 doi:10.1371/journal.pone.0064522.t001

**Table 2.** Logistic regression analysis of the association between racial/ethnic assignment group and health-related outcomes (Minority/Minority as reference group).

| Health Outcomes                                         | Racial/ethnic assignment groups     |                           |                   |
|---------------------------------------------------------|-------------------------------------|---------------------------|-------------------|
|                                                         | (self-identified/socially-assigned) |                           |                   |
|                                                         | Minority/Minority                   | Minority/White            | White/White       |
|                                                         | OR (CI)                             | OR (CI)                   | OR (CI)           |
| <b>Have Personal Physician</b>                          |                                     |                           |                   |
| Unadjusted OR                                           | 1.00                                | 1.03 (0.87, 1.23)         | 1.67 (1.55, 1.78) |
| Adjusted OR <sup>a</sup>                                | 1.00                                | 1.07 (0.79, 1.46)         | 1.15 (1.02, 1.29) |
| <b>Received Influenza vaccine within last 12 months</b> |                                     |                           |                   |
| Unadjusted OR                                           | 1.00                                | 2.12 (1.36, 3.31)         | 2.26 (1.87, 2.73) |
| Adjusted OR <sup>a</sup>                                | 1.00                                | 1.83 (1.16, 2.87)         | 1.81 (1.48, 2.21) |
| <b>Ever received pneumococcal vaccine</b>               |                                     |                           |                   |
| Unadjusted OR                                           | 1.00                                | 1.56 (1.01, 2.40)         | 2.48 (2.05, 3.00) |
| Adjusted OR <sup>a</sup>                                | 1.00                                | 1.43 (0.93, 2.20) $p=0.1$ | 2.20 (1.78, 2.71) |
| <b>Breast Cancer Screening</b>                          |                                     |                           |                   |
| Unadjusted OR                                           | 1.00                                | 1.08 (0.80, 1.47)         | 1.23 (1.10, 1.38) |
| Adjusted OR <sup>b</sup>                                | 1.00                                | 0.89 (0.65, 1.21)         | 0.87 (0.77, 0.98) |
| <b>Cervical Cancer Screening</b>                        |                                     |                           |                   |
| Unadjusted OR                                           | 1.00                                | 1.14 (0.65, 1.98)         | 1.05 (0.86, 1.27) |
| Adjusted OR <sup>b</sup>                                | 1.00                                | 0.89 (0.49, 1.60)         | 0.67 (0.54, 0.84) |
| <b>Prostate Cancer Screening</b>                        |                                     |                           |                   |
| Unadjusted OR                                           | 1.00                                | 1.50 (0.95, 2.37)         | 1.40 (1.13, 1.74) |
| Adjusted OR <sup>b</sup>                                | 1.00                                | 0.93 (0.73, 1.19)         | 0.93 (0.73, 1.19) |
| <b>Colorectal Cancer Screening</b>                      |                                     |                           |                   |
| Unadjusted OR                                           | 1.00                                | 1.32 (0.84, 2.05)         | 1.42 (1.18, 1.71) |
| Adjusted OR <sup>a</sup>                                | 1.00                                | 1.01 (0.83, 1.24)         | 1.01 (0.83, 1.24) |
| <b>Perceived Healthcare Discrimination</b>              |                                     |                           |                   |
| <i>Yes</i>                                              |                                     |                           |                   |
| Unadjusted OR                                           | 1.00                                | 0.56 (0.36, 0.86)         | 0.20 (0.17, 0.24) |
| Adjusted OR <sup>a</sup>                                | 1.00                                | 0.61 (0.39, 0.95)         | 0.27 (0.22, 0.33) |
| <i>Uncertain</i>                                        |                                     |                           |                   |
| Unadjusted OR                                           | 1.00                                | 1.31 (0.87, 1.97)         | 1.32 (1.15, 1.50) |
| Adjusted OR <sup>a</sup>                                | 1.00                                | 1.34 (0.86, 2.09)         | 1.24 (1.06, 1.44) |

OR = Odds Ratio; CI = Confidence Interval.

$p=0.05$ .

<sup>a</sup>Regression Model adjusted for sex, health insurance status, marital status, education, employment status, income and age.

<sup>b</sup>Regression Model adjusted for health insurance status, marital status, education, employment status, income and age.

doi:10.1371/journal.pone.0064522.t002

M/W group had lower rates of pneumococcal immunization than the W/W group. These key differences in healthcare outcomes persisted after we adjusted for potential explanatory factors including health insurance, marital status, education, employment, and income.

Previously published comparisons with whites have repeatedly demonstrated lower rates of both influenza and pneumococcal vaccinations among African Americans and Hispanic Americans [5–10], populations disproportionately burdened with bacterial pneumonia [32] and associated, preventable hospitalizations [33]. Yet, our finding that M/W group immunization and cancer screening rates were most frequently similar to those of W/W respondents, suggests M/W represents a unique subset of racial/ethnic minority patients. These findings are consistent with earlier

research demonstrating that self-identified racial/ethnic minorities who are socially-assigned as white had better self-reported overall health status compared to those who are socially-assigned as non-white [4]. Contrary to our initial hypothesis, there were no differences in prostate or colorectal cancer screening rates between groups, and, after adjustment, M/M women were more likely to receive breast and cervical cancer screening compared with W/W women. Prior studies have found no clear association between perceived discrimination and cancer screening [18,34,35], suggesting that although racial/ethnic minority patients experience discrimination in healthcare settings, they may participate in cancer screening programs that employ culturally-appropriate outreach strategies. In turn, immunization programs may seek to adopt some of these methods.

The concept of “white advantage” conferred to a sub-group of self-identified racial/ethnic minority individuals should be considered in our sample, and Hispanic Americans are most likely among racial/ethnic minority groups to be socially-assigned as white, thus potentially benefitting from this phenomenon. Among many of the socio-demographic indicators, including having completed high school and household income, the W/W and M/M groups were at disparate ends of the spectrum, while the M/W group consistently had intermediate proportions or mean values. Our findings of relative socioeconomic privilege among the M/W group may reflect the continued legacy of racism and skin colour prejudices that are perpetuated in the United States. For example, there is substantial evidence that among racial/ethnic minorities, darker skin pigmentation is associated with lower educational attainment, occupational status, and income [36,37], and is adversely associated with health outcomes such as mortality risk [38], and self-reported physical health [39]. Therefore, being a minority who is perceived as non-Hispanic white may confer both socioeconomic and healthcare advantages.

Our findings that M/M respondents were almost twice as likely as M/W respondents to report having experienced healthcare discrimination in the previous year, and that M/W respondents reported healthcare discrimination more frequently than W/W respondents, likely have important implications. Previous reports have associated healthcare discrimination with poor health outcomes [22,40,41], and other studies have associated healthcare discrimination with delays in obtaining ordered tests and treatment, not filling prescriptions [21], and low patient satisfaction and adherence [42]. Although both self-identification and social assignment of minority status are associated with reported healthcare discrimination, our findings suggest M/W and M/M respondents represent two distinct groups. Moreover, the M/W status conveys a unique experience within the healthcare setting; rates of reported healthcare discrimination and utilization of vaccinations for the M/W group differs significantly from either the M/M or the W/W groups. Findings from the emerging field of physician implicit bias, suggesting a role for unconscious influences on decision-making, may be particularly relevant in this context [43–47].

Our work represents a novel inquiry into how self-identified race and socially-assigned race might influence interactions within healthcare settings. Nevertheless, there are some limitations. Although the BRFSS offered a unique opportunity to conduct this study in a large sample of U.S. adults, there are some challenges inherent to its cross-sectional design and sampling approach. First, we cannot assess causality or directionality; however, we have firmly demonstrated several significant associations which merit further exploration. Second, the study relied on the self-report of preventive health service utilization and self-report of socially-assigned race. Validation studies of self-reported immunization and cancer screening, have demonstrated that these data are generally valid, particularly within one year [48–50], and

development and validation of self-reported racial/ethnic healthcare discrimination measures remains an area of active research [51,52]. We also lack data on the demographic or other characteristics of healthcare providers and systems with whom respondents interacted. Still, this work has strength in the capture of divergent healthcare experiences from a broad sample of participants across a spectrum of racial/ethnic identities. Third, we selected the 2004 survey because it is the survey year with the greatest number of states using the optional “Reactions to Race” module. Although the overall response rate was typical for BRFSS, the results may only be applicable to the seven states and District of Columbia which self-selected to obtain this information from their residents. Fourth, all non-white respondents were collapsed together to create the M/W and M/M categories. Because certain minority groups enjoy better overall health status, our dichotomous categorization scheme may have attenuated the impact of socially-assigned race on marginalized racial/ethnic minorities, and it fails to demonstrate all of the inequities existing between racial/ethnic minority groups. Therefore, the differences across groups may be even greater than we observed in our analyses. Finally, our study examined multiple healthcare outcomes, thereby increasing our likelihood of a type I error, or rejecting the null hypothesis. Although there is internal consistency in our results, readers should bear this in mind.

These results suggest that in order to fully understand how race and racism may be mediating health inequities in the United States, it is important to assess not only how patients self-identify their race/ethnicity, but also how they report their socially-assigned race/ethnicity. Future studies are needed to investigate the correlation between self-reported socially-assigned race/ethnicity and race/ethnicity reported by observers and to elucidate the mechanisms by which socially-assigned race leads to biases and inequities in healthcare. Provider bias and patient experience of bias may be barriers to receipt of immunizations and merits further investigation and provider education. Understanding the factors enabling full participation in preventive care by the M/W group will allow future interventions to be designed and targeted in the most efficient ways possible.

## Acknowledgments

We would like to extend our appreciation to the CDC’s Racism and Health Working Group’s Science and Publication Committee for developing and refining the Reactions to Race module, especially Drs. Geraldine Perry and Camara Jones, and also to Tara Rizzo for her assistance revising and formatting the manuscript.

## Author Contributions

Conceived and designed the experiments: TM MD TL BJ MNS. Performed the experiments: TM MD TL BJ MNS. Analyzed the data: TM MD TL BJ MNS. Contributed reagents/materials/analysis tools: TM MD TL BJ MNS. Wrote the paper: TM MD TL BJ MNS.

## References

1. Smedley BD, Stith AY, Nelson AR, editors (2003) *Unequal Treatment: Confronting Racial and Ethnic Disparities in Health Care*. Washington, DC:National Academies Press.764 p.
2. Agency for Healthcare Research and Quality (2008) *2007 National Healthcare Disparities Report*. Rockville, MD:U.S. Department of Health and Human Services.
3. Ulmer C, McFadden B, Nerenz DR (2009) *Race, Ethnicity, and Language Data. Standardization for Health Care Quality Improvement*. Washington, D.C.:The National Academies Press. pp. 264.
4. Jones CP, Truman BI, Elam-Evans LD, Jones CA, Jones CY, et al. (2008) Using “socially assigned race” to probe white advantages in health status. *Ethn Dis* 18: 496–504.
5. Bonito AJ, Lenfestey NF, Eicheldinger C, Iannacchione VG, Campbell L (2004) Disparities in immunizations among elderly Medicare beneficiaries, 2000 to 2002. *Am J Prev Med* 27: 153–160.
6. Centers for Disease Control and Prevention (CDC) (2009) *Early Release of Selected Estimates Based on Data from the January–June 2009 National Health Interview Survey*. Hyattsville, MD:National Center for Health Statistics .pp. 109.
7. O’Malley AS, Forrest CB (2006) Immunization disparities in older Americans: determinants and future research needs. *Am J Prev Med* 31: 150–158.
8. Hebert PL, Frick KD, Kane RL, McBean AM (2005) The causes of racial and ethnic differences in influenza vaccination rates among elderly Medicare beneficiaries. *Health Serv Res* 40: 517–537.

9. Winston CA, Wortley PM, Lees KA (2006) Factors associated with vaccination of medicare beneficiaries in five U.S. communities: Results from the racial and ethnic adult disparities in immunization initiative survey, 2003. *J Am Geriatr Soc* 54: 303–310.
10. Lees KA, Wortley PM, Coughlin SS (2005) Comparison of racial/ethnic disparities in adult immunization and cancer screening. *Am J Prev Med* 29: 404–411.
11. Feresu SA, Zhang W, Puumala SE, Ullrich F, Anderson JR (2008) Breast and cervical cancer screening among low-income women in Nebraska: findings from the Every Woman Matters program, 1993–2004. *J Health Care Poor Underserved* 19: 797–813.
12. Bazargan M, Bazargan SH, Farooq M, Baker RS (2004) Correlates of cervical cancer screening among underserved Hispanic and African-American women. *Prev Med* 39: 465–473.
13. Smith-Bindman R, Miglioretto DL, Lurie N, Abraham L, Barbash RB, et al. (2006) Does utilization of screening mammography explain racial and ethnic differences in breast cancer? [Summary for patients in *Ann Intern Med*. 2006 Apr 18;144(8):118; PMID: 16618948]. *Ann Intern Med* 144: 541–553.
14. Carpenter WR, Godley PA, Clark JA, Talcott JA, Finnegan T, et al. (2009) Racial differences in trust and regular source of patient care and the implications for prostate cancer screening use. *Cancer* 115: 5048–5059.
15. Gilligan T, Wang PS, Levin R, Kantoff PW, Avorn J (2004) Racial differences in screening for prostate cancer in the elderly. *Arch Intern Med* 164: 1858–1864.
16. Cooper GS, Koroukian SM (2004) Racial disparities in the use of and indications for colorectal procedures in Medicare beneficiaries. *Cancer* 100: 418–424.
17. Selvin E, Brett KM (2003) Breast and cervical cancer screening: socio-demographic predictors among White, Black, and Hispanic women. *Am J Public Health* 93: 618–623.
18. Trivedi AN, Ayanian JZ (2006) Perceived discrimination and use of preventive health services. *J Gen Intern Med* 21: 553–558.
19. Perez D, Sribney WM, Rodriguez MA (2009) Perceived discrimination and self-reported quality of care among Latinos in the United States. *J Gen Intern Med* 24 Suppl 3: 548–554.
20. Casagrande SS, Gary TL, LaVeist TA, Gaskin DJ, Cooper LA (2007) Perceived discrimination and adherence to medical care in a racially integrated community. *J Gen Intern Med* 22: 389–395.
21. Van Houtven CH, Voils CI, Oddone EZ, Weinfurt KP, Friedman JY, et al. (2005) Perceived discrimination and reported delay of pharmacy prescriptions and medical tests. *J Gen Intern Med* 20: 578–583.
22. Gee GC, Ryan A, Laflamme DJ, Holt J (2006) Self-Reported Discrimination and Mental Health Status Among African Descendants, Mexican Americans, and Other Latinos in the New Hampshire REACH 2010 Initiative: The Added Dimension of Immigration. *Am J Public Health* 96: 1821–1828.
23. Wagner J, Abbott G (2007) Depression and depression care in diabetes: relationship to perceived discrimination in African Americans. *Diabetes Care* 30: 364–366.
24. Jones CP (2000) Levels of racism: a theoretic framework and a gardener's tale. *Am J Public Health* 90: 1212–1215.
25. Centers for Disease Control and Prevention (CDC) (2004) Behavioral Risk Factor Surveillance System Survey Data. Atlanta, Georgia: U.S. Department of Health and Human Services.
26. Centers for Disease Control and Prevention (CDC) (2005) 2004 Behavioral Risk Factor Surveillance System - Summary Data Quality Report. Atlanta, Georgia: U.S. Department of Health and Human Services. pp. 38.
27. Centers for Disease Control and Prevention (CDC) (2004) Updated Interim Influenza Vaccination Recommendations - 2004-05 Influenza Season. Morbidity and Mortality Weekly Report. Atlanta, GA: U.S. Department of Health and Human Services. pp. 1183–1184.
28. Centers for Disease Control and Prevention (CDC) (2003) Recommended Adult Immunization Schedule - United States, 2003–2004. Morbidity and Mortality Weekly Report. Atlanta, GA: U.S. Department of Health and Human Services. pp. 965–969.
29. Smith RA, Cokkinides V, Eyre HJ (2004) American Cancer Society guidelines for the early detection of cancer, 2004. *CA Cancer J Clin* 54: 41–52.
30. SAS, Version 9.2. Copyright © 2008 SAS Institute Inc. SAS and all other SAS Institute Inc. product or service names are registered trademarks or trademarks of SAS Institute Inc., Cary, NC, USA.
31. SUDAAN. Release 10.0. Copyright © 2008 RTI International, Raleigh, NC, USA.
32. Burton DC, Flannery B, Bennett NM, Farley MM, Gershman K, et al. (2010) Socioeconomic and racial/ethnic disparities in the incidence of bacteremic pneumonia among US adults. *Am J Public Health* 100: 1904–1911.
33. Biello KB, Rawlings J, Carroll-Scott A, Browne R, Ickovics JR (2010) Racial disparities in age at preventable hospitalization among U.S. Adults. *Am J Prev Med* 38: 54–60.
34. Benjamins MR (2012) Racial/Ethnic discrimination and preventive service utilization in a sample of Whites, Blacks, Mexicans, and Puerto Ricans. *Medical Care* 50: 870–876.
35. Hausmann LRM, Kwonho J, Bost JE, Ibrahim SA (2008) Perceived Discrimination in Health Care and Use of Preventive Health Services. *J Gen Intern Med* 23 (10): 1679–1684.
36. Keith VM, Herring C (1991) Skin Tone and Stratification in the Black Community. *Am J Sociol* 97: 760–778.
37. Goldsmith AH, Hamilton D, Darity Jr W (2007) From Dark to Light: Skin Color and Wages Among African-Americans. *J Hum Resour* 42: 701–738.
38. Borrell LN, Crespo CJ, Garcia-Palmieri MR (2007) Skin color and mortality risk among men: the Puerto Rico Heart Health Program. *Ann Epidemiol* 17: 335–341.
39. Kiang L, Takeuchi DT (2009) Phenotypic Bias and Ethnic Identity in Filipino Americans. *Soc Sci Q* 90: 428–445.
40. Williams DR, Neighbors HW, Jackson JS (2003) Racial/ethnic discrimination and health: findings from community studies. *Am J Public Health* 93: 200–208.
41. Richman LS, Kohn-Wood LP, Williams DR (2007) The role of discrimination and racial identity for mental health service utilization. *J Soc Clin Psychol* 26: 960–981.
42. Penner LA, Dovidio JF, Edmondson D, Dailey RK, Markova T, et al. (2009) The Experience of Discrimination and Black-White Health Disparities in Medical Care. *J Black Psychol* 35: 180–203.
43. Burgess D, van Ryn M, Dovidio J, Saha S (2007) Reducing racial bias among health care providers: lessons from social-cognitive psychology. *J Gen Intern Med* 22: 882–887.
44. Burgess DJ (2010) Are providers more likely to contribute to healthcare disparities under high levels of cognitive load? How features of the healthcare setting may lead to biases in medical decision making. *Med Decis Making* 30:246–257.PMID:19726783.
45. Green AR, Carney DR, Pallin DJ, Ngo LH, Raymond KL, et al. (2007) Implicit bias among physicians and its prediction of thrombolysis decisions for black and white patients. *J Gen Intern Med* 22:1231–1238.PMID:17594129 .
46. Johnson RL, Saha S, Arbelaez JJ, Beach MC, Cooper LA (2004) Racial and ethnic differences in patient perceptions of bias and cultural competence in health care. *J Gen Intern Med* 19: 101–110.
47. Penner LA, Dovidio JF, West TV, Gaertner SL, Albrecht TL, et al. (2010) Aversive Racism and Medical Interactions with Black Patients: A Field Study. *J Exp Soc Psychol* 46: 436–440.
48. McPhee SJ, Nguyen TT, Shema SJ, Nguyen B, Somkin C, et al. (2002) Validation of recall of breast and cervical cancer screening by women in an ethnically diverse population. *Prev Med* 35: 463–473.
49. Zapka JG, Bigelow C, Hurley T, Ford LD, Egelhofer J, et al. (1996) Mammography use among sociodemographically diverse women: the accuracy of self-report. *Am J Public Health* 86: 1016–1021.
50. Shenson D, Dimartino D, Bolen J, Campbell M, Lu PJ, et al. (2005) Validation of self-reported pneumococcal vaccination in behavioral risk factor surveillance surveys: experience from the sickness prevention achieved through regional collaboration (SPARC) program. *Vaccine* 23: 1015–1020.
51. Kressin NR, Raymond KL, Manze M (2008) Perceptions of race/ethnicity-based discrimination: a review of measures and evaluation of their usefulness for the health care setting. *J Health Care Poor Underserved* 19: 697–730.
52. Shariff-Marco S, Gee GC, Breen N, Willis G, Reeve BB, et al. (2009) A mixed-methods approach to developing a self-reported racial/ethnic discrimination measure for use in multiethnic health surveys. *Ethn Dis* 19: 447–453.
